# Supplementary material
Source: Research Square preprint supplement (doi:10.21203/rs.3.rs-9190215/v1)
Supplement: Supplementary file 1 [file 84f9642b901287fcec053e01.docx]

**Supplemental File 2: Data Extraction Table – empirical studies**

|  | **First Author (Year)** | **Location of study** | **Sample / asthma severity** | **Age range of participants*** | **Study Design** | **Data Collection (assessment of stigma)** | **Types of stigmas identified** |
| --- | --- | --- | --- | --- | --- | --- | --- |
| 1 | Adewuya (2017) | Lagos, Nigeria | N=203 adults with asthma and 205 healthy controls. Asthma severity ranged from mild (n=98, 48.3%), moderate (n=71, 35.0%), to severe cases 34 patients (16.7%) | 18-65 years old. | Case-control study | Multiple questionnaires and diagnostic instruments. An adapted 5 item “asthma treatment stigma scale” from the Stigma Scale for Receiving Psychological Help scale used to assess stigma. | The stigma scale asks about feelings of shame, inadequacy, less favourable perception/treatment, hiding from people and being less liked because of asthma. N= 75 (36.9%) patients had high level of stigma while 128 (63.1%) patients had low level of stigma. No significant association found between stigma of asthma treatment and presence of anxiety and depression. |
| 2 | Alzayer (2022) | Riyadh, Saudi Arabia | N=23 participants, 8 had asthma and 11 were carers of a child with asthma. | 18 years old and above. 1 participant aged 70. | Qualitative study | Semi-structured interviews (Arabic) Interviews were audio-taped, transcribed + verbatim. Used Asthma Control Test™ - questionnaire to gauge asthma control status. | Embarrassment/Shame: using inhalers in public - "people start looking and feel worried".  Social/Cultural Stigma: socio-culturally bound beliefs where having asthma may be considered a stigma. Misidentification Stigma: symptoms might be mistaken (eg. tuberculosis). |
| 3 | Ahmad (2015) | Selangor, Malaysia | N=18 asthma patients from two different health care service settings (n=9 from hospital and n=9 from pharmacy). Severity of asthma not reported. | Mean age 49.3 years (+/- 11.02 years) | Qualitative study | A semi-structured interview guide was developed and used during the interview process | Patients’ experiences of stigma were common across both healthcare service settings investigated. Newly diagnosed asthma patients were quite reluctant to accept themselves as asthma patients. Stigma was observed in terms of the extent of disclosure about diagnosis status, societal discrimination and discrimination felt in society. The study explored how patients’ feelings were affected by stigma and the different ways adapted to tackle the stigma of asthma |
| 4 | Ahmad (2020) | Selangor, Malaysia | N=152 patients with asthma. The severity of the patients was characterised as not well-controlled asthma by the Asthma Control Test | Adult asthma patients mean age 52.03 (+/- 15.1) years. N=105 aged >45 years. | Cross-sectional survey study | Developed a custom survey to assess self-stigma and self-esteem. Patients’ socio-demographics, medical data, and asthma control scores were recorded from electronic medical records | The enrolled patients in the study showed moderate levels of self-stigma. Self-stigma showed weak positive correlation with emergency visits. Asthma control showed moderate negative and weak positive correlations with self-stigma and self-esteem, respectively. |
| 5 | Ahmed (2025) | Kenya and Sudan | Community members split in groups based on age. Includes 2 male and 1 female group >40 years (Sudan) and 1 male, 1 female group >35 years in Kenya + in-depth interviews with primary care and hospital clinicians | Adolescents and adults with several focus groups of participants aged >40 years. | Focus groups and in-depth interviews | In-depth interviews and focus group discussions | Asthma identified as a stigmatised disease in both Sudan and Kenya. Anticipated, internalised and enacted stigma was described and contributed to poor treatment outcomes, which in turn perpetuate the negative perceptions of people with asthma that shape resistance to diagnosis and manifestations of stigma. Delayed healthcare seeking and delayed uptake of treatment, including self-medication (without appropriate information), giving incomplete histories to professionals, inappropriate treatments, refusing registration for chronic care, and repeated emergency care seeking.  Perception of asthma aetiology and prognosis were drivers of stigma, particularly in contexts of low-income and insecure livelihoods that depend on physical labour. |
| 6 | Andrews  (2013) | Australia. | N=72 study participants recruited by snowball sampling. Most had poor control of asthma. | Mean age 33 (St Dev 14.8) years. | Cross sectional survey study. | In addition to asthma control measures, the survey included questions assessing stigma using 19 items adapted from the Stigma Scale for Mental Health. | Just more than half of respondents (51%) reported low levels of stigma. Stigma related to non-disclosure – reluctance to reveal or hiding information about their condition. Stigma also related to the respondent’s feeling that they are being treated unfairly or differently as a result of their asthma. E.g. "I would have had better chances in life if I had not had asthma" |
| 7 | Davis (2019) | Sydney, Australia | N=24 adults with asthma, N=17 prescribed preventers. | 18+ years and older (including veterans) | Descriptive qualitative design. | Semi-structured interviews conducted by telephone or face-to-face. Interviews digitally recorded and transcribed verbatim. | Public Medication Stigma: Barriers included perceived stigma (using asthma medicines in public). |
| 8 | Foster (2017) | Sydney, Australia | N=25 interviews with people living with severe asthma (48% living in disadvantaged settings). | 23-81 years (median age 54 years) | Qualitative study specifically using an in-depth, semi-structured design. | Semi structured telephone interviews (audio recorded and transcribed verbatim). Collected basic demographic data and Asthma Control Test (ACT) scores. | Stigma of Difference/Concealment: Embarrassed and conceal inhaler use/symptoms in public (treated differently/"specialised”). Stigma of Misunderstanding: Public confusion between severe asthma and milder, "easily controlled" asthma (judgement). Stigma of Physical Appearance: Embarrassment and unhappiness about side-effects that changed physical appearance (weight gain, being "puffy" from oral corticosteroids). Stigma of Insensitivity: Insensitive comments from friends/public. |
| 9 | Koh (2021) | KL, Malaysia | N=24 participants with doctor diagnosed asthma – n=11 uncontrolled, n=11 partly controlled, n=2 well controlled. | Aged 18 – 70 years old (3 aged 50-60 and 5 aged 60-70). | Qualitative study | Individual in-depth interviews (audio-recorded and conducted in participants' preferred language - Malay, English, or Mandarin/mix). Self-completed questionnaire for collecting sociodemographic and GINA asthma control data used. | Embarrassment/Public Use: about using inhalers in public. Functional Stigma: Stigma hinders adherence and affects everyday life and socialising. Maladaptive Coping Stigma: Led one participant to smoke rather than using an inhaler. |
| 10 | Ma (2023) | Ningbo, China | N=35 patients with doctor diagnosed respiratory disease (20 with asthma; 15 with COPD) and 15 health 11care providers. | 18-65 years (n=7 aged 51-65 years) | Qualitative study. | Semi-structured interviews conducted face-to-face in Mandarin and audio-recorded for transcription. The SEIPS 2.0 model guided interview content and analysis. | Internalised Stigma/Self-Blame: Ashamed and embarrassed to use inhaler around family/colleagues; social devaluation/ discrediting (believing it was "all my fault"). Enacted Stigma from Clinicians: Perceived discrimination from a nurse (referred to patient as "dumb patient" due to inhaler difficulty). |
| 11 | Persaud (2023) | Ohio, USA / UK / Global | N=124 adults completed the survey. Eleven participants completed interviews and 15 took part in focus groups.  Participants in interviews and focus groups reported moderate to severe asthma | Aged 25 to 75+ years old (43 between 55-64 years, 24 between 65-74, 7 older than 75) | Convergent parallel mixed-methods design. | Quantitative: Online surveys collecting steroid use and rating AEs on a 5-point burden scale. Qualitative: Semi-structured interviews followed by virtual in-depth focus groups (3 sessions). | Psychosocial Burden/Embarrassment: Qualitative data found psychosocial burden of inhaled corticosteroid (ICS) use as an emergent theme. Embarrassment with using ICS in front of others (e.g. hiding the act - going to the restroom or quickly pulling it out). |
| 12 | Snadden (1991) | Ontario, Canada / UK | Recruited from primary care in rural Ontario. N=18 patients with asthma completed the survey and n=7 completed an interview. Inhaler use was frequent (n=4), often (n=1), sometimes (n=10) or almost never (n=3). | 18-54 years old. | Sequential mixed methods design. | Quantitative: Postal survey using questionnaire (Likert scale) collect attitudinal and demographic data.  Qualitative: In depth semi-structured open-ended interviews conducted with a sub-sample. | Negative attitude toward stigma and pessimism reported by n=6 (33.3%) of survey respondents. Significant association between feelings of stigma and inhaler use.  Felt stigma: embarrassment and unease (seen using medication in public, often felt rather than enacted). Misidentification Stigma: Mistaken for a "druggie". Stigma of Disability/Difference: Feeling of being handicapped or different (e.g., feeling like a "cripple") and not being "within the norm of society". Stigma seemed to be a more general emotion which resulted from a feeling of being handicapped or feeling different (in particular from medicine use) rather than from asthma itself. |
| 13 | Svedsater (2017) | Brentford, UK | N=72 people participants in focus groups or individual interviews N=39 had asthma and n=33 had COPD. Asthma severity was mild (n=9, 22%), moderate (n=20, 50%), or severe (n=10, 28%) | Adults older than 18 years  (mean 35.5  +/- 13.4 years) | Qualitative study | Individual interviews (telephone) and Focus groups (face-to-face). A semi-structured interview guide used. Data also collected using paper-completed questionnaires for sociodemographic data, severity/control. | Self-Consciousness/Public Use: Emotional impacts (embarrassment, stigma, and/or self-consciousness). Reported self-consciousness related to not wanting to use an inhaler in public. Stigma of Difference/Judgement: Reported feeling stigmatised, feeling judged, being singled out (different). Stigma of Visible Symptoms: Feeling social isolation because (stared at in public when they cough or breathe heavily). |
| 14 | Tam-Williams (2018) | Missouri, USA / African America | N=158 African-Americans completed the survey.  64 participants with asthma (self-reported), no information provided on severity of asthma. | Ages ranged from 18 to 75.  (42 between 46-60 and 4 between  60-75) | Cross-sectional study. A Community-Based Participatory Research approach for survey development. | Survey questionnaire (37-item) using Likert-type response options collected during community events and text responses. | Stigma of Teasing: Included beliefs about whether those with asthma would be teased. Stigma of Fragility/Illness: Included belief that asthma only occurred in the "sickly". Stigma of Mortality: Included belief that people with asthma die earlier. |
| 15 | Young (2015) | Georgia, USA | N=46 consultations were examined. Mean Asthma Control Test score was 16.4 suggesting somewhat well controlled asthma | Aged 19 years or older (mean age 43.9 +/- 15 SD). | Retrospective review of documentation. | Pharmacists conducted telephone consultations with participants that included open ended and probing questions. Data reviewed included documented barriers (knowledge, beliefs, practical) and the Asthma Control Test (ACT) scores. | General Stigma: Stigma formally classified by pharmacists as one category of patient "belief barriers" to medication use. |
| 16 | Hosseininia et al (2025) | Lung Clinic of Imam Khomeini Hospital, Iran | 300 patients with confirmed diagnosis of asthma according to GINA guidelines, and referred to a lung clinic | Not stated* | Cross-sectional survey | Researcher designed 40-item questionnaire to capture perceived benefits of medications, fear of side effects, social stigma related to MDI use, disease acceptance, self-efficacy, knowledge of MDI use, adherence to MDI use | Social stigma related to MDI use. Medication adherence correlated negatively with stigma |

***** Age ranges reflect original study samples. Studies were included if they contained participants aged ≥55 years or provided extractable age‑related insights consistent with the review’s focus. For studies without a reported age range, adult populations in routine care settings were assumed where justified by the sampling frame and study aims.
