# Supplementary material
Source: Research Square preprint supplement (doi:10.21203/rs.3.rs-9190215/v1)
Supplement: Supplementary file 2 [file eef9cc608dd472b6750e97de.docx]

**Supplementary File 1- Search Strategy**

Conceptual logic across databases: (Asthma OR Medications/Devices) AND Aging/Older Adults AND Stigma. The table presents the exact Ovid MEDLINE search lines used including final combination and limits.

**DATABASE 1 - OVID Medline.**

| **Line #** | **Search statement (Ovid MEDLINE)** |
| --- | --- |
| 1 | exp Asthma/ |
| 2 | asthma.mp. |
| 3 | asthma*.mp. |
| 4 | bronchial asthma.mp. |
| 5 | 1 or 2 or 3 or 4 |
| 6 | aged.mp. or "Aged, 80 and over"/ or exp Aged/ |
| 7 | aging/ or cognitive aging/ |
| 8 | septuagenarian.mp. |
| 9 | hexagenarian.mp. |
| 10 | old*.mp. |
| 11 | geriatric.mp. or exp Geriatrics/ |
| 12 | elder*.mp. [mp=title, abstract, full text, caption text] |
| 13 | Old Age Assistance/ |
| 14 | veteran*.mp. [mp=title, abstract, full text, caption text] |
| 15 | pension*.mp. [mp=title, abstract, full text, caption text] |
| 16 | grandparent*.mp. [mp=title, abstract, full text, caption text] |
| 17 | 6 or 7 or 8 or 9 or 10 or 11 or 12 or 13 or 14 or 15 or 16 |
| 18 | Stereotyping/ or Social Stigma/ or Stigma.mp. |
| 19 | aggression/ or deception/ or dehumanization/ or harassment, non-sexual/ or help-seeking behavior/ or intersectional framework/ or permissiveness/ or prejudice/ or rejection, psychology/ or self-control/ or social adjustment/ or social conformity/ or social defeat/ or social discrimination/ or psychological distance/ or social isolation/ or social marginalization/ or social stigma/ or stereotyping/ |
| 20 | Intersectional Stigma.mp. |
| 21 | exp Age Factors/ or Ageism.mp. or exp Ageism/ |
| 22 | attitud*/ or "attitude of health personnel"/ or attitude to death/ or attitude to health.mp. [mp=title, book title, abstract, original title, name of substance word, subject heading word, floating sub-heading word, keyword heading word, organism supplementary concept word, protocol supplementary concept word, rare disease supplementary concept word, unique identifier, synonyms, population supplementary concept word, anatomy supplementary concept word] |
| 23 | 18 or 19 or 20 or 21 or 22 |
| 24 | administration, inhalation/ or administration, intravenous/ or administration, oral/ |
| 25 | exp anti-asthmatic agents/ |
| 26 | bronchodilator.mp. or exp Bronchodilator Agents/ |
| 27 | asthma medication*.mp. |
| 28 | exp adrenergic beta-agonists/ or adrenergic beta-2 receptor agonists/ |
| 29 | exp muscarinic antagonists/ |
| 30 | short acting beta agonist.mp. |
| 31 | SABA.mp. |
| 32 | inhaled corticosteroid*.mp. |
| 33 | ICS.mp. |
| 34 | exp "Nebulizers and Vaporizers"/ |
| 35 | asthma puffer.mp. |
| 36 | Formoterol Fumarate/ or Budesonide/ or asthma reliever.mp. |
| 37 | exp Ventilators, Mechanical/ |
| 38 | LABA.mp. |
| 39 | Long acting beta agonist.mp. |
| 40 | combination inhaler.mp. |
| 41 | theophylline.mp. |
| 42 | albuterol.mp. |
| 43 | ventolin.mp. |
| 44 | oral corticosteroid.mp. |
| 45 | 24 or 25 or 26 or 27 or 28 or 29 or 30 or 31 or 32 or 33 or 34 or 35 or 36 or 37 or 38 or 39 or 40 or 41 or 42 or 43 or 44 |
| 46 | 5 or 45 |
| 47 | 46 and 17 and 23 |
| 48 | limit 47 to english language |
| 49 | limit 48 to "all adult (19 plus years)" |

**DATABASE 2 – EMBASE (Ovid)**

| **Line #** | **Search statement** |
| --- | --- |
| 1 | exp asthma/ |
| 2 | asthma.ti,ab,kw. |
| 3 | asthma*.ti,ab,kw. |
| 4 | "bronchial asthma".ti,ab,kw. |
| 5 | 1 or 2 or 3 or 4 |
| 6 | aged/ |
| 7 | aging/ or cognitive aging/ |
| 8 | septuagenarian*.ti,ab,kw. |
| 9 | hexagenarian*.ti,ab,kw. |
| 10 | old*.ti,ab,kw. |
| 11 | geriatric/ or geriatric*.ti,ab,kw. |
| 12 | elder*.ti,ab,kw. |
| 13 | "old age assistance"/ |
| 14 | veteran*.ti,ab,kw. |
| 15 | pension*.ti,ab,kw. |
| 16 | grandparent*.ti,ab,kw. |
| 17 | 6 or 7 or 8 or 9 or 10 or 11 or 12 or 13 or 14 or 15 or 16 |
| 18 | stereotyping/ or social stigma/ or stigma.ti,ab,kw. |
| 19 | aggression/ or deception/ or dehumanization/ or harassment/ or help seeking behavior/ or intersectionality/ or permissiveness/ or prejudice/ or rejection/ or self control/ or social adjustment/ or social conformity/ or social defeat/ or social discrimination/ or psychological distance/ or social isolation/ or social marginalization/ or social stigma/ or stereotyping/ |
| 20 | "intersectional stigma".ti,ab,kw. |
| 21 | age factor/ or ageism/ or ageism.ti,ab,kw. |
| 22 | attitud*.ti,ab,kw. or health personnel attitude/ or attitude to death/ or attitude to health/ |
| 23 | 18 or 19 or 20 or 21 or 22 |
| 24 | drug inhalation/ or intravenous drug administration/ or oral drug administration/ |
| 25 | exp antiasthmatic agent/ |
| 26 | bronchodilator agent/ or bronchodilator*.ti,ab,kw. |
| 27 | "asthma medication*".ti,ab,kw. |
| 28 | exp beta 2 adrenergic receptor agonist/ |
| 29 | exp muscarinic antagonist/ |
| 30 | "short acting beta agonist".ti,ab,kw. |
| 31 | SABA.ti,ab,kw. |
| 32 | inhaled corticosteroid*.ti,ab,kw. |
| 33 | ICS.ti,ab,kw. |
| 34 | nebulizer/ or vaporizer/ |
| 35 | "asthma puffer".ti,ab,kw. |
| 36 | formoterol fumarate/ or budesonide/ or "asthma reliever".ti,ab,kw. |
| 37 | mechanical ventilator/ |
| 38 | LABA.ti,ab,kw. |
| 39 | "long acting beta agonist".ti,ab,kw. |
| 40 | combination inhaler*.ti,ab,kw. |
| 41 | theophylline/ |
| 42 | salbutamol/ |
| 43 | ventolin.ti,ab,kw. |
| 44 | oral corticosteroid*.ti,ab,kw. |
| 45 | 24 or 25 or 26 or 27 or 28 or 29 or 30 or 31 or 32 or 33 or 34 or 35 or 36 or 37 or 38 or 39 or 40 or 41 or 42 or 43 or 44 |
| 46 | 5 or 45 |
| 47 | 46 and 17 and 23 |
| 48 | limit 47 to (english language and (adult <18 to 64 years> or aged <65+ years>)) |

**DATABASE 3 – Emcare (Ovid)**

| **Line #** | **Search statement** |
| --- | --- |
| 1 | exp asthma/ |
| 2 | asthma.ti,ab,kw. |
| 3 | asthma*.ti,ab,kw. |
| 4 | "bronchial asthma".ti,ab,kw. |
| 5 | 1 or 2 or 3 or 4 |
| 6 | exp aged/ |
| 7 | aging/ or cognitive aging/ |
| 8 | septuagenarian*.ti,ab,kw. |
| 9 | hexagenarian*.ti,ab,kw. |
| 10 | old*.ti,ab,kw. |
| 11 | geriatric/ or geriatric*.ti,ab,kw. |
| 12 | elder*.ti,ab,kw. |
| 13 | "old age assistance"/ |
| 14 | veteran*.ti,ab,kw. |
| 15 | pension*.ti,ab,kw. |
| 16 | grandparent*.ti,ab,kw. |
| 17 | 6 or 7 or 8 or 9 or 10 or 11 or 12 or 13 or 14 or 15 or 16 |
| 18 | stereotyping/ or social stigma/ or stigma.ti,ab,kw. |
| 19 | aggression/ or deception/ or dehumanization/ or harassment/ or help seeking behavior/ or intersectionality/ or permissiveness/ or prejudice/ or rejection/ or self control/ or social adjustment/ or social conformity/ or social defeat/ or social discrimination/ or psychological distance/ or social isolation/ or social marginalization/ or social stigma/ or stereotyping/ |
| 20 | "intersectional stigma".ti,ab,kw. |
| 21 | age factor/ or ageism/ or ageism.ti,ab,kw. |
| 22 | attitud*.ti,ab,kw. or health personnel attitude/ or attitude to death/ or attitude to health/ |
| 23 | 18 or 19 or 20 or 21 or 22 |
| 24 | drug inhalation/ or intravenous drug administration/ or oral drug administration/ |
| 25 | exp antiasthmatic agent/ |
| 26 | bronchodilator agent/ or bronchodilator*.ti,ab,kw. |
| 27 | "asthma medication*".ti,ab,kw. |
| 28 | exp beta 2 adrenergic receptor agonist/ |
| 29 | exp muscarinic antagonist/ |
| 30 | "short acting beta agonist".ti,ab,kw. |
| 31 | SABA.ti,ab,kw. |
| 32 | inhaled corticosteroid*.ti,ab,kw. |
| 33 | ICS.ti,ab,kw. |
| 34 | nebulizer/ or vaporizer/ |
| 35 | "asthma puffer".ti,ab,kw. |
| 36 | formoterol fumarate/ or budesonide/ or "asthma reliever".ti,ab,kw. |
| 37 | mechanical ventilator/ |
| 38 | LABA.ti,ab,kw. |
| 39 | "long acting beta agonist".ti,ab,kw. |
| 40 | combination inhaler*.ti,ab,kw. |
| 41 | theophylline/ |
| 42 | salbutamol/ |
| 43 | ventolin.ti,ab,kw. |
| 44 | oral corticosteroid*.ti,ab,kw. |
| 45 | 24 or 25 or 26 or 27 or 28 or 29 or 30 or 31 or 32 or 33 or 34 or 35 or 36 or 37 or 38 or 39 or 40 or 41 or 42 or 43 or 44 |
| 46 | 5 or 45 |
| 47 | 46 and 17 and 23 |
| 48 | limit 47 to (english language and (adult <18 to 64 years> or aged <65+ years>)) |

**DATABASE 4 – (PsychINFO (Ovid)**

| **Line #** | **Search statement** |
| --- | --- |
| 1 | exp Asthma/ |
| 2 | asthma.ti,ab. |
| 3 | asthma*.ti,ab. |
| 4 | "bronchial asthma".ti,ab. |
| 5 | 1 or 2 or 3 or 4 |
| 6 | exp Aging/ |
| 7 | exp Older Adults/ or Gerontology/ |
| 8 | aging.ti,ab. or "cognitive aging".ti,ab. |
| 9 | septuagenarian*.ti,ab. |
| 10 | hexagenarian*.ti,ab. |
| 11 | old*.ti,ab. |
| 12 | geriatric*.ti,ab. |
| 13 | elder*.ti,ab. |
| 14 | veteran*.ti,ab. |
| 15 | pension*.ti,ab. |
| 16 | grandparent*.ti,ab. |
| 17 | 6 or 7 or 8 or 9 or 10 or 11 or 12 or 13 or 14 or 15 or 16 |
| 18 | exp Stigma/ or exp Stereotyping/ or stigma.ti,ab. |
| 19 | exp Prejudice/ or prejudice.ti,ab. |
| 20 | ageism.ti,ab. or exp Ageism/ |
| 21 | "intersectional stigma".ti,ab. |
| 22 | attitud*.ti,ab. or exp Attitudes/ |
| 23 | 18 or 19 or 20 or 21 or 22 |
| 24 | "drug administration".ti,ab. |
| 25 | "antiasthmatic agent*".ti,ab. |
| 26 | bronchodilator*.ti,ab. |
| 27 | "asthma medication*".ti,ab. |
| 28 | "beta 2 agonist*".ti,ab. |
| 29 | "muscarinic antagonist*".ti,ab. |
| 30 | "short acting beta agonist".ti,ab. |
| 31 | SABA.ti,ab. |
| 32 | "inhaled corticosteroid*".ti,ab. |
| 33 | ICS.ti,ab. |
| 34 | nebulizer*.ti,ab. or vaporizer*.ti,ab. |
| 35 | "asthma puffer".ti,ab. |
| 36 | formoterol.ti,ab. or budesonide.ti,ab. or "asthma reliever".ti,ab. |
| 37 | ventilator*.ti,ab. |
| 38 | LABA.ti,ab. |
| 39 | "long acting beta agonist".ti,ab. |
| 40 | "combination inhaler*".ti,ab. |
| 41 | theophylline.ti,ab. |
| 42 | albuterol.ti,ab. or salbutamol.ti,ab. |
| 43 | ventolin.ti,ab. |
| 44 | "oral corticosteroid*".ti,ab. |
| 45 | 24 or 25 or 26 or 27 or 28 or 29 or 30 or 31 or 32 or 33 or 34 or 35 or 36 or 37 or 38 or 39 or 40 or 41 or 42 or 43 or 44 |
| 46 | 5 or 45 |
| 47 | 46 and 17 and 23 |
| 48 | limit 47 to english language |
| 49 | limit 48 to (adult <18 to 64 years> or aged <65+ years>) |

**DATABASE 5 – CINAHL (EBSCO)**

| **Line #** | **Search statement** |
| --- | --- |
| 1 | (MH "Asthma+") |
| 2 | TI(asthma OR asthma* OR "bronchial asthma") OR AB(asthma OR asthma* OR "bronchial asthma") |
| 3 | (MH "Aged+") OR (MH "Very Old Age (80+)") OR (MH "Geriatrics+") |
| 4 | TI(aging OR "cognitive aging" OR septuagenarian* OR hexagenarian* OR old* OR geriatric* OR elder* OR veteran* OR pension* OR grandparent*) OR AB(aging OR "cognitive aging" OR septuagenarian* OR hexagenarian* OR old* OR geriatric* OR elder* OR veteran* OR pension* OR grandparent*) |
| 5 | (MH "Social Stigma") OR (MH "Stereotyping") OR (MH "Prejudice") OR (MH "Ageism") OR TI(stigma OR stigmatiz* OR stereotyp* OR prejudice OR "intersectional stigma" OR ageism OR attitud*) OR AB(stigma OR stigmatiz* OR stereotyp* OR prejudice OR "intersectional stigma" OR ageism OR attitud*) |
| 6 | TI("drug administration" OR antiasthmatic* OR bronchodilator* OR "asthma medication*" OR "beta 2 agonist*" OR "muscarinic antagonist*" OR "short acting beta agonist" OR SABA OR "inhaled corticosteroid*" OR ICS OR nebulizer* OR vaporizer* OR "asthma puffer" OR formoterol OR budesonide OR "asthma reliever" OR ventilator* OR LABA OR "long acting beta agonist" OR "combination inhaler*" OR theophylline OR albuterol OR salbutamol OR ventolin OR "oral corticosteroid*") OR AB("drug administration" OR antiasthmatic* OR bronchodilator* OR "asthma medication*" OR "beta 2 agonist*" OR "muscarinic antagonist*" OR "short acting beta agonist" OR SABA OR "inhaled corticosteroid*" OR ICS OR nebulizer* OR vaporizer* OR "asthma puffer" OR formoterol OR budesonide OR "asthma reliever" OR ventilator* OR LABA OR "long acting beta agonist" OR "combination inhaler*" OR theophylline OR albuterol OR salbutamol OR ventolin OR "oral corticosteroid*") |
| 7 | (S1 OR S6) AND S3 AND S5  /* Combine within CINAHL interface using named sets */ |
| 8 | Apply interface limits: Language=English; Age Groups=Adult and/or Aged |

**DATABASE 6 – SCOPUS**

| **Line #** | **Search statement** |
| --- | --- |
| 1 | TITLE-ABS-KEY(asthma) OR TITLE-ABS-KEY(asthma*) OR TITLE-ABS-KEY("bronchial asthma") |
| 2 | TITLE-ABS-KEY("drug administration") OR TITLE-ABS-KEY(antiasthmatic*) OR TITLE-ABS-KEY(bronchodilator*) OR TITLE-ABS-KEY("asthma medication*") OR TITLE-ABS-KEY("beta 2 agonist*") OR TITLE-ABS-KEY("muscarinic antagonist*") OR TITLE-ABS-KEY("short acting beta agonist") OR TITLE-ABS-KEY(SABA) OR TITLE-ABS-KEY("inhaled corticosteroid*") OR TITLE-ABS-KEY(ICS) OR TITLE-ABS-KEY(nebulizer*) OR TITLE-ABS-KEY(vaporizer*) OR TITLE-ABS-KEY("asthma puffer") OR TITLE-ABS-KEY(formoterol) OR TITLE-ABS-KEY(budesonide) OR TITLE-ABS-KEY("asthma reliever") OR TITLE-ABS-KEY(ventilator*) OR TITLE-ABS-KEY(LABA) OR TITLE-ABS-KEY("long acting beta agonist") OR TITLE-ABS-KEY("combination inhaler*") OR TITLE-ABS-KEY(theophylline) OR TITLE-ABS-KEY(albuterol) OR TITLE-ABS-KEY(salbutamol) OR TITLE-ABS-KEY(ventolin) OR TITLE-ABS-KEY("oral corticosteroid*") |
| 3 | TITLE-ABS-KEY(aging OR "cognitive aging" OR septuagenarian* OR hexagenarian* OR old* OR geriatric* OR elder* OR veteran* OR pension* OR grandparent*) |
| 4 | TITLE-ABS-KEY(stigma OR stigmatiz* OR "intersectional stigma" OR stereotyp* OR prejudice OR ageism OR attitud*) |
| 5 | ( ( #1 ) OR ( #2 ) ) AND ( #3 ) AND ( #4 )   /* Combine within Scopus by pasting blocks and using parentheses */ |
| 6 | Apply filters in UI: Language=English |
